# Supplementary material for: Evidence of a prolonged drought ca. 4200 yr BP correlated with prehistoric settlement abandonment from the Gueldaman GLD1 Cave, Northern Algeria
Source: Copernicus journal article supplement (doi:10.5194/cp-12-1-2016), 2016-01-15
Supplement: Supplementary file 1 [file cp-12-1-2016-supplement.pdf]

Supplement of Clim. Past, 12, 1–14, 2016  
<http://www.clim-past.net/12/1/2016/>  
doi:10.5194/cp-12-1-2016-supplement  
© Author(s) 2016. CC Attribution 3.0 License.

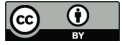

Climate  
of the Past

Open Access

The logo for the European Geosciences Union (EGU), featuring the letters 'EGU' inside a stylized circular gear-like shape.

*Supplement of*

**Evidence of a prolonged drought ca. 4200 yr BP correlated with prehistoric settlement abandonment from the Gueldaman GLD1 Cave, Northern Algeria**

**J. Ruan et al.**

*Correspondence to:* J. Ruan (jiaoyangruan@gmail.com)

The copyright of individual parts of the supplement might differ from the CC-BY 3.0 licence.

## Supplement

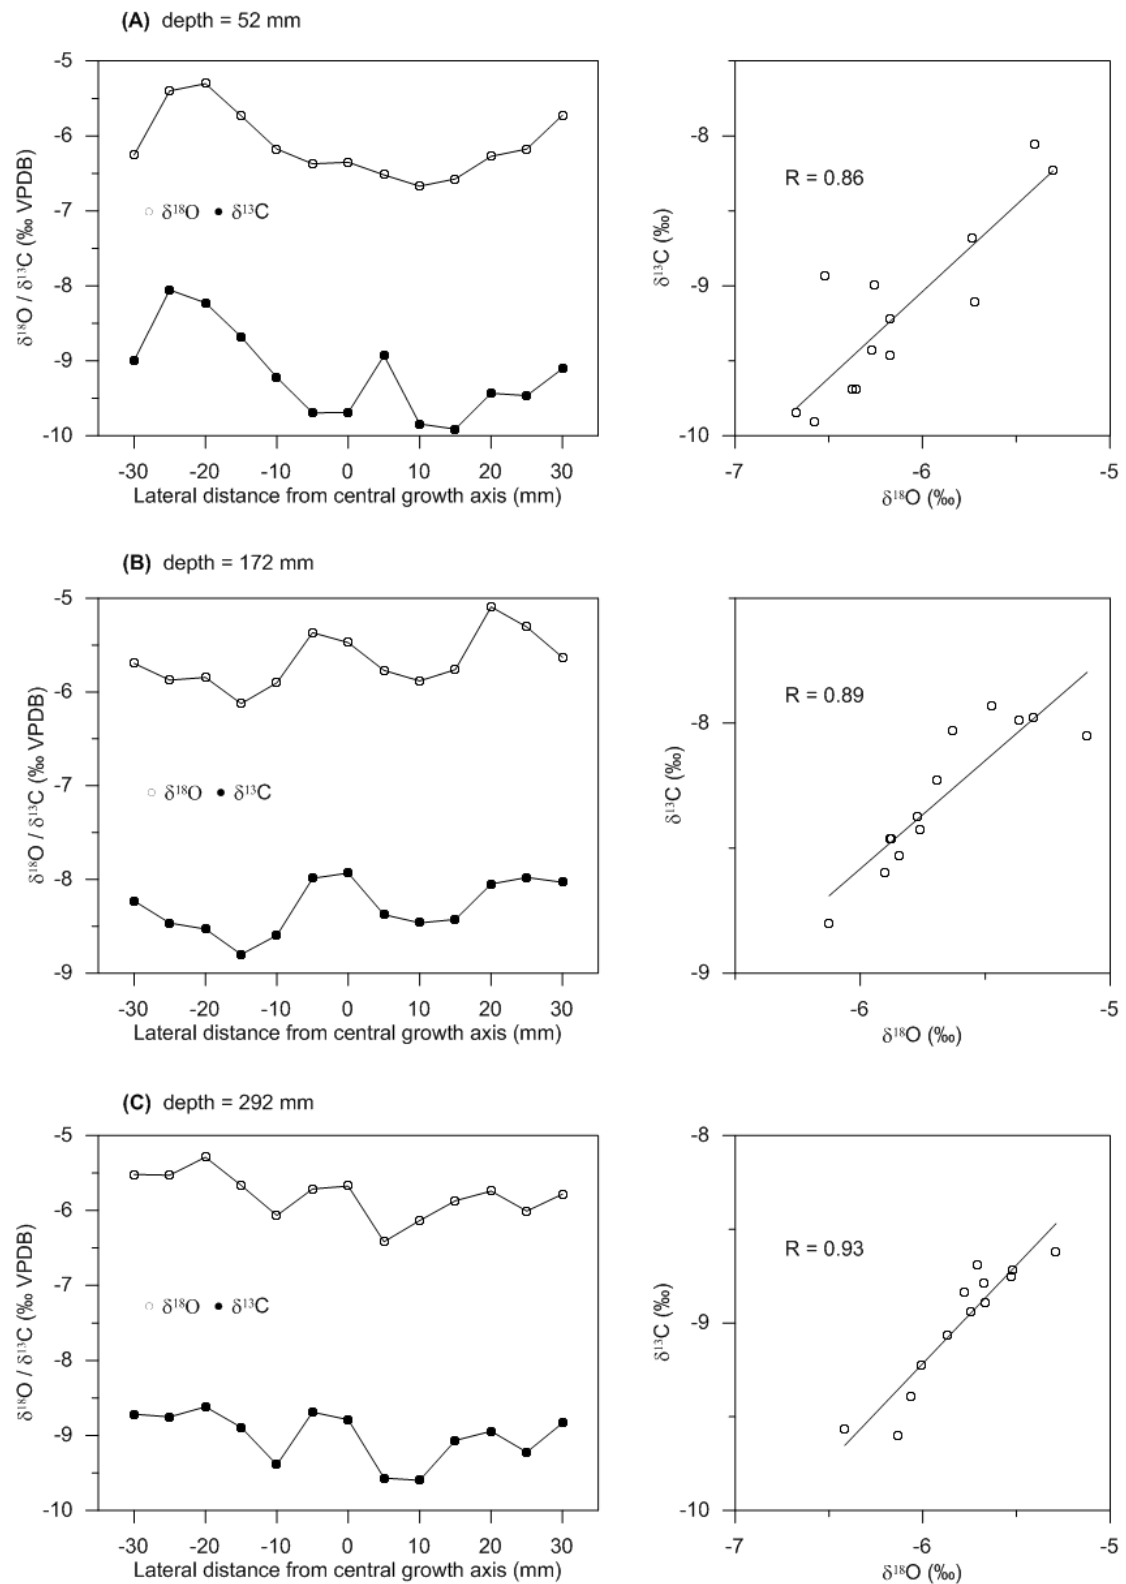

Figure 1. The Hendy test from stalagmite GLD1-stm2.

Carbon and oxygen isotopic compositions were measured along visible single lamina, from the apex to the edge, at depths of (A) 52 mm, (B) 172 mm and (C) 292 mm. The

$\delta^{18}\text{O}$  and  $\delta^{13}\text{C}$  values are plotted along lateral distance from the central growth axis on the left panel and their relations (correlation coefficient  $R$ ) are presented on the right panel. Results show that the  $\delta^{18}\text{O}$  and  $\delta^{13}\text{C}$  values significantly correlate and simultaneously increase by up to  $\sim 1\%$  from the apex to the edge probably due to the presence of progressive kinetic fractionations when feeding waters flow outwards from the apex, suggesting that the stalagmite precipitated at isotopic non-equilibrium conditions.
